# Supplementary material
Source: PubMed Central journal article supplement (PMC10269155)
Supplement: aac.00221-23-s0001.pdf [file aac.00221-23-s0001.pdf]

**TABLE S1 Demographic characteristics of patients with and without CDI recurrence**

| Variables                                                            | rCDI<br>(N=66) | Non-rCDI<br>(N=177) | Univariate analysis |                |
|----------------------------------------------------------------------|----------------|---------------------|---------------------|----------------|
|                                                                      |                |                     | OR (95% CI)         | <i>P</i> value |
| Gender, male [n, (%)]                                                | 33 (50.00)     | 89 (50.28)          | 0.989 (0.562-1.740) | 0.969          |
| Age (years, mean ± SD)                                               | 70.82±15.77    | 63.25±19.38         | 1.024 (1.007-1.041) | 0.006          |
| BMI (mean ± SD)                                                      | 22.92±4.08     | 23.30±3.48          | 0.972 (0.899-1.050) | 0.468          |
| Hospital stays before CDI (≥10 days) [n, (%)]                        | 36 (54.55)     | 57 (32.20)          | 2.526 (1.417-4.503) | 0.002          |
| Medical history [n, (%)]                                             |                |                     |                     |                |
| 1) Smoking                                                           | 20 (30.30)     | 42 (23.73)          | 1.398 (0.745-2.621) | 0.297          |
| 2) ICU admission                                                     | 15 (22.73)     | 21 (11.86)          | 2.185 (1.049-4.553) | 0.037          |
| 3) Abdominal surgery                                                 | 12 (18.18)     | 17 (9.60)           | 2.092 (0.939-4.658) | 0.071          |
| 4) Mechanical ventilation                                            | 13 (19.70)     | 19 (10.73)          | 2.040 (0.943-4.410) | 0.070          |
| 5) Cardio-cerebrovascular diseases                                   | 19 (28.79)     | 50 (28.25)          | 1.027 (0.549-1.919) | 0.934          |
| 6) Peptic ulcer                                                      | 10 (15.15)     | 11 (6.21)           | 2.695 (1.087-6.684) | 0.032          |
| 7) Malignant tumor                                                   | 13 (19.70)     | 25 (14.12)          | 1.491 (0.712-3.124) | 0.290          |
| 8) Chronic kidney failure                                            | 11 (16.67)     | 17 (9.60)           | 1.882 (0.831-4.265) | 0.130          |
| 9) Diabetes                                                          | 10 (15.15)     | 24 (13.56)          | 1.138 (0.512-2.530) | 0.750          |
| 10) Connective tissue disorder                                       | 2 (3.03)       | 5 (2.82)            | 1.075 (0.203-5.681) | 0.932          |
| Drug usage [n, (%)]                                                  |                |                     |                     |                |
| 1) Immunosuppressive agents                                          | 9 (13.64)      | 10 (5.65)           | 2.637 (1.446-5.958) | 0.045          |
| 2) Aminosalicylic acid                                               | 14 (21.21)     | 21 (11.86)          | 2.000 (0.949-4.215) | 0.068          |
| 3) Chemotherapeutic drugs                                            | 13 (19.70)     | 23 (12.99)          | 1.642 (0.777-3.471) | 0.194          |
| 4) Glucocorticoids                                                   | 27 (40.91)     | 55 (31.07)          | 1.536 (0.856-2.756) | 0.151          |
| 5) Antifungal agents                                                 | 11 (16.67)     | 22 (12.43)          | 1.409 (0.642-3.094) | 0.393          |
| 6) Antibacterial agents                                              |                |                     |                     |                |
| β-lactams                                                            | 48 (72.73)     | 127 (71.75)         | 1.050 (0.558-1.977) | 0.880          |
| Aminoglycosides                                                      | 4 (6.06)       | 7 (3.95)            | 1.567 (0.443-5.537) | 0.486          |
| Macrolides                                                           | 8 (12.12)      | 13 (7.34)           | 1.740 (0.686-4.411) | 0.243          |
| Tetracyclines                                                        | 0 (0.00)       | 2 (1.13)            | 0.000 (0.000-)      | 0.999          |
| Fluoroquinolones                                                     | 23 (34.85)     | 50 (28.25)          | 1.359 (0.743-2.483) | 0.319          |
| Glycopeptides                                                        | 16 (24.24)     | 28 (15.82)          | 1.703 (0.852-3.404) | 0.132          |
| Sulfonamides                                                         | 1 (1.52)       | 3 (1.69)            | 0.892 (0.091-8.733) | 0.922          |
| 7) PPIs                                                              |                |                     |                     |                |
| Omeprazole                                                           | 33 (50.00)     | 49 (27.68)          | 2.612 (1.457-4.685) | 0.001          |
| Pantoprazole                                                         | 13 (19.70)     | 24 (13.56)          | 1.564 (0.743-3.290) | 0.239          |
| Esomeprazole                                                         | 12 (18.18)     | 19 (10.73)          | 1.848 (0.842-4.055) | 0.126          |
| Rabeprazole                                                          | 6 (9.09)       | 11 (6.21)           | 1.509 (0.535-4.259) | 0.437          |
| Accumulated duration of antibacterial agents use (≥4 weeks) [n, (%)] | 12 (18.18)     | 14 (7.91)           | 2.587 (1.128-5.935) | 0.025          |
| Accumulated duration of PPIs use (≥8 weeks) [n, (%)]                 | 19 (28.79)     | 24 (13.56)          | 2.577 (1.299-5.112) | 0.007          |
| Fever (≥38 °C) [n, (%)]                                              | 25 (37.88)     | 47 (26.55)          | 1.687 (0.927-3.070) | 0.087          |
| Blood tests (mean ± SD)                                              |                |                     |                     |                |
| 1) WBC (×10 <sup>9</sup> /L)                                         | 8.24±5.56      | 7.99±5.09           | 1.009 (0.957-1.065) | 0.736          |
| 2) PCT (ng/mL)                                                       | 2.03±5.01      | 1.85±4.35           | 1.009 (0.949-1.072) | 0.780          |
| 3) Cr (umol/L)                                                       | 78.93±49.83    | 79.05±40.76         | 1.000 (0.993-1.007) | 0.985          |

|                         |             |             |                       |       |
|-------------------------|-------------|-------------|-----------------------|-------|
| 4) ALB (g/L)            | 29.96±5.42  | 32.58±6.68  | 0.935 (0.892-0.981)   | 0.005 |
| 5) CRP (mg/L)           | 47.88±49.61 | 43.97±54.08 | 1.001 (0.996-1.007)   | 0.608 |
| FOBT positive [n, (%)]  | 31 (46.97)  | 62 (35.03)  | 1.643 (0.926-2.916)   | 0.090 |
| STs [n, (%)]            |             |             |                       | 0.028 |
| 1) Other ST             | 11 (16.67)  | 51 (28.81)  | Reference             | -     |
| 2) ST42                 | 7 (10.61)   | 28 (15.82)  | 1.159 (0.404-3.325)   | 0.784 |
| 3) ST2                  | 6 (9.09)    | 25 (14.12)  | 1.113 (0.369-3.356)   | 0.850 |
| 4) ST3                  | 12 (18.18)  | 14 (7.91)   | 3.974 (1.448-10.905)  | 0.007 |
| 5) ST54                 | 4 (6.06)    | 15 (8.47)   | 1.236 (0.343-4.451)   | 0.745 |
| 6) ST1                  | 2 (3.03)    | 1 (0.56)    | 9.273 (0.771-111.541) | 0.079 |
| 7) ST5                  | 1 (1.52)    | 5 (2.82)    | 0.927 (0.098-8.743)   | 0.947 |
| 8) ST81                 | 21 (31.82)  | 29 (16.38)  | 3.357 (1.420-7.936)   | 0.006 |
| 9) ST37                 | 2 (3.03)    | 9 (5.08)    | 1.030 (0.195-5.446)   | 0.972 |
| CCI (mean ± SD)         | 6.92±4.18   | 7.25±3.34   | 0.974 (1.642-9.481)   | 0.522 |
| SSI (mean ± SD)         | 3.61±1.92   | 2.92±1.58   | 1.270 (1.071-1.505)   | 0.006 |
| ATLAS Score (mean ± SD) | 4.03±1.60   | 3.83±1.82   | 1.067 (0.908-1.254)   | 0.431 |

Abbreviations: rCDI, recurrent *Clostridioides difficile* infection; BMI, body mass index; PPI, proton pump inhibitor; WBC, white blood cell; PCT, procalcitonin; Cr, creatinine; ALB, albumin; CRP, C-reactive protein; FOBT, fecal occult blood test; ST, sequence type; CCI, Charlson comorbidity index; SSI, severity score index; OR, odds ratio; CI, confidence interval

**TABLE S2 Antibiotic susceptibility profiles of 50 ST81 strains to 14 antibacterial agents**

| Antibacterial agents | MIC <sub>50</sub> (µg/mL) | MIC <sub>90</sub> (µg/mL) | MIC range (µg/mL) | MIC mode (µg/mL) | Resistance rate (%) |
|----------------------|---------------------------|---------------------------|-------------------|------------------|---------------------|
| MET                  | 0.5                       | 1                         | 0.125-1           | 1                | 0.00                |
| VAN                  | 0.5                       | 0.5                       | 0.25-1            | 0.5              | 0.00                |
| CIP                  | 64                        | >128                      | 64->128           | 64               | 100.00              |
| LEV                  | 64                        | 128                       | 4-128             | 64               | 92.00               |
| MXF                  | 64                        | 128                       | 2-128             | 64               | 80.00               |
| AMP                  | 0.5                       | 2                         | 0.25-2            | 0.25             | 12.00               |
| TZP                  | 8/4                       | 8/4                       | 2/4-8/4           | 8/4              | 0.00                |
| CLI                  | 128                       | 128                       | 64-128            | 128              | 100.00              |
| MEM                  | 2                         | 4                         | 1-4               | 2                | 0.00                |
| CRO                  | 64                        | >128                      | 32->128           | 64               | 88.00               |
| CTT                  | 64                        | >128                      | 32->128           | 32               | 64.00               |
| FDX                  | 0.125                     | 0.25                      | 0.125-0.5         | 0.125            | 0.00                |
| RFP                  | ≤0.004                    | ≤0.004                    | ≤0.004-0.016      | ≤0.004           | 0.00                |
| TGC                  | 0.063                     | 0.063                     | 0.031-0.063       | 0.063            | 0.00                |

Abbreviations: MET, metronidazole; VAN, vancomycin; CIP, ciprofloxacin; LEV, levofloxacin; MXF, moxifloxacin; AMP, ampicillin; TZP, piperacillin/tazobactam; CLI, clindamycin; MEM, meropenem; CRO, ceftriaxone; CTT, cefotetan; FDX, fidaxomicin; RFP, rifaximin; TGC, tigecycline.

**TABLE S3 Primers sequences used in this study**

| Lab notation | Sequence (5'-3')               | Use                                                              | Product size (bp) |
|--------------|--------------------------------|------------------------------------------------------------------|-------------------|
| QP01F        | TTGAGTCTCTTGAAGTGGTCTAGG       | <i>spo0A</i> qRT-PCR primer                                      | 143               |
| QP01R        | CTCAAAGCGCAATAAATCTAGGAGC      |                                                                  |                   |
| QP02F        | TGACTTTACACTTTCATCTGTTTCTAGC   | <i>sigE</i> qRT-PCR primer                                       | 86                |
| QP02R        | GGGCAAATATACTTCCTCCTCCAT       |                                                                  |                   |
| QP03F        | CGCTCCTAACTAGACCTAAATTGC       | <i>sigF</i> qRT-PCR primer                                       | 140               |
| QP03R        | GGAAGTAACTGTTGCCAGAGAAGA       |                                                                  |                   |
| QP04F        | ATCTTGAACCTGATCCATAACGA        | <i>sigG</i> qRT-PCR primer                                       | 104               |
| QP04R        | CAGTTGTAATGGCACTTGATGC         |                                                                  |                   |
| QP05F        | TCCAAGCCCTGCACATATCC           | <i>cspBA</i> qRT-PCR primer                                      | 87                |
| QP05R        | CGAGCTATCGCAGAAAATGACC         |                                                                  |                   |
| QP06F        | TGTGCTCCCACTTATCTGGAC          | <i>cspC</i> qRT-PCR primer                                       | 150               |
| QP06R        | TGGTGCAGGAAATCAAGGGA           |                                                                  |                   |
| QP07F        | CACCTAAGTCTTTACTGCCCCA         | <i>sleC</i> qRT-PCR primer                                       | 100               |
| QP07R        | CCTCCTACATCAAGACAGCCA          |                                                                  |                   |
| QP08F        | GCATCAATCAATCCAATGACTCCAC      | <i>sigD</i> qRT-PCR primer                                       | 100               |
| QP08R        | TGCCTCTGTAAAGAGTATAGCA         |                                                                  |                   |
| QP09F        | GTTGTTATAACCAGCTGAAGCCATTA     | <i>fliC</i> qRT-PCR primer                                       | 115               |
| QP09R        | TACAAGTTGGAGCAAGTTATGGAAC      |                                                                  |                   |
| QP10F        | GCAACTAATCTAAGAAGTCAGACAA      | <i>flgB</i> qPCR primer                                          | 112               |
| QP10R        | TAGGCATAGTATCATTTAGTGTTC       |                                                                  |                   |
| QP11F        | CTCTAGTTCTAAGATGGACCTTATCTC    | <i>motA</i> qRT-PCR primer                                       | 110               |
| QP11R        | CAATAGAAAGTGATGTAATGGGAATAGAAG |                                                                  |                   |
| QP12F        | AGTAAGAAATAACTCAGTAGATGATT     | <i>tcdR</i> qRT-PCR primer                                       | 113               |
| QP12R        | TTATTAAATCTGTTTCTCCCTCTTCA     |                                                                  |                   |
| QP13F        | TGGTGAAGATGGTGTTCATGC          | <i>tcdB</i> qRT-PCR primer                                       | 100               |
| QP13R        | TTCTCCCTCAAATTTCTCATCC         |                                                                  |                   |
| QP14F        | TTTGATTTACTGGCCGGAGCATTG       | <i>codY</i> qRT-PCR primer                                       | 126               |
| QP14R        | CTCATCTTCTATAACTGAACTGTCTTGAGC |                                                                  |                   |
| QP15F        | AAATGGGATAGAAGAGTTGCTAAA       | <i>ccpA</i> qRT-PCR primer                                       | 153               |
| QP15R        | TCTTGTTCAACTATCCATGAAATCATAAC  |                                                                  |                   |
| QP16F        | AGTGAAAGGCTACGGCTCAA           | <i>rrn</i> qRT-PCR primer                                        | 100               |
| QP16R        | CTACGCATTTACCGCTACA            |                                                                  |                   |
| OS01F        | GAGCAACTTTTCGAAGAAATA          | OS-PCR primer for 630 reference strain                           | ON: 401           |
| OS02F        | TATTTCTTCGAAAAGTTGCTC          |                                                                  | OFF: /            |
| OS03F        | AAGGCAACTTATAAAGAAATATTT       | OS-PCR primer for R20291 reference strain                        | ON: 403           |
| OS04F        | AAATATTTCTTTATAAAGTTGCCTT      |                                                                  | OFF: 272          |
| OS05F        | AGAGCAACTTTTTGAAGAAAT          | OS-PCR primer for 1470 reference strain and ST81 clinical strain | ON: 403           |
| OS06F        | ATTTCTTCAAAAAGTTGCTCT          |                                                                  | OFF: 268          |
| OS07F        | GAGCAACTTTTTGAAGAAATAT         | OS-PCR primer for DSM 28669 reference strain                     | ON: /             |
| OS08F        | ATATTTCTTCAAAAAGTTGCTC         |                                                                  | OFF: 269          |
| OS00R        | AGAATTGTCTGTTTTTCTTCTA         | A common reverse primer used in all OS-PCR                       | /                 |

|        |                     |                                         |                     |
|--------|---------------------|-----------------------------------------|---------------------|
| QOS01F | TTCATGGGACTTCATTGAA | qOS-PCR primer for ST81 clinical strain | ON: 194<br>OFF: 161 |
| QOS02F | TTCAATGAAGTCCCATGAA |                                         |                     |
| QOS00R | ATGTCATATGTATTCACT  |                                         |                     |

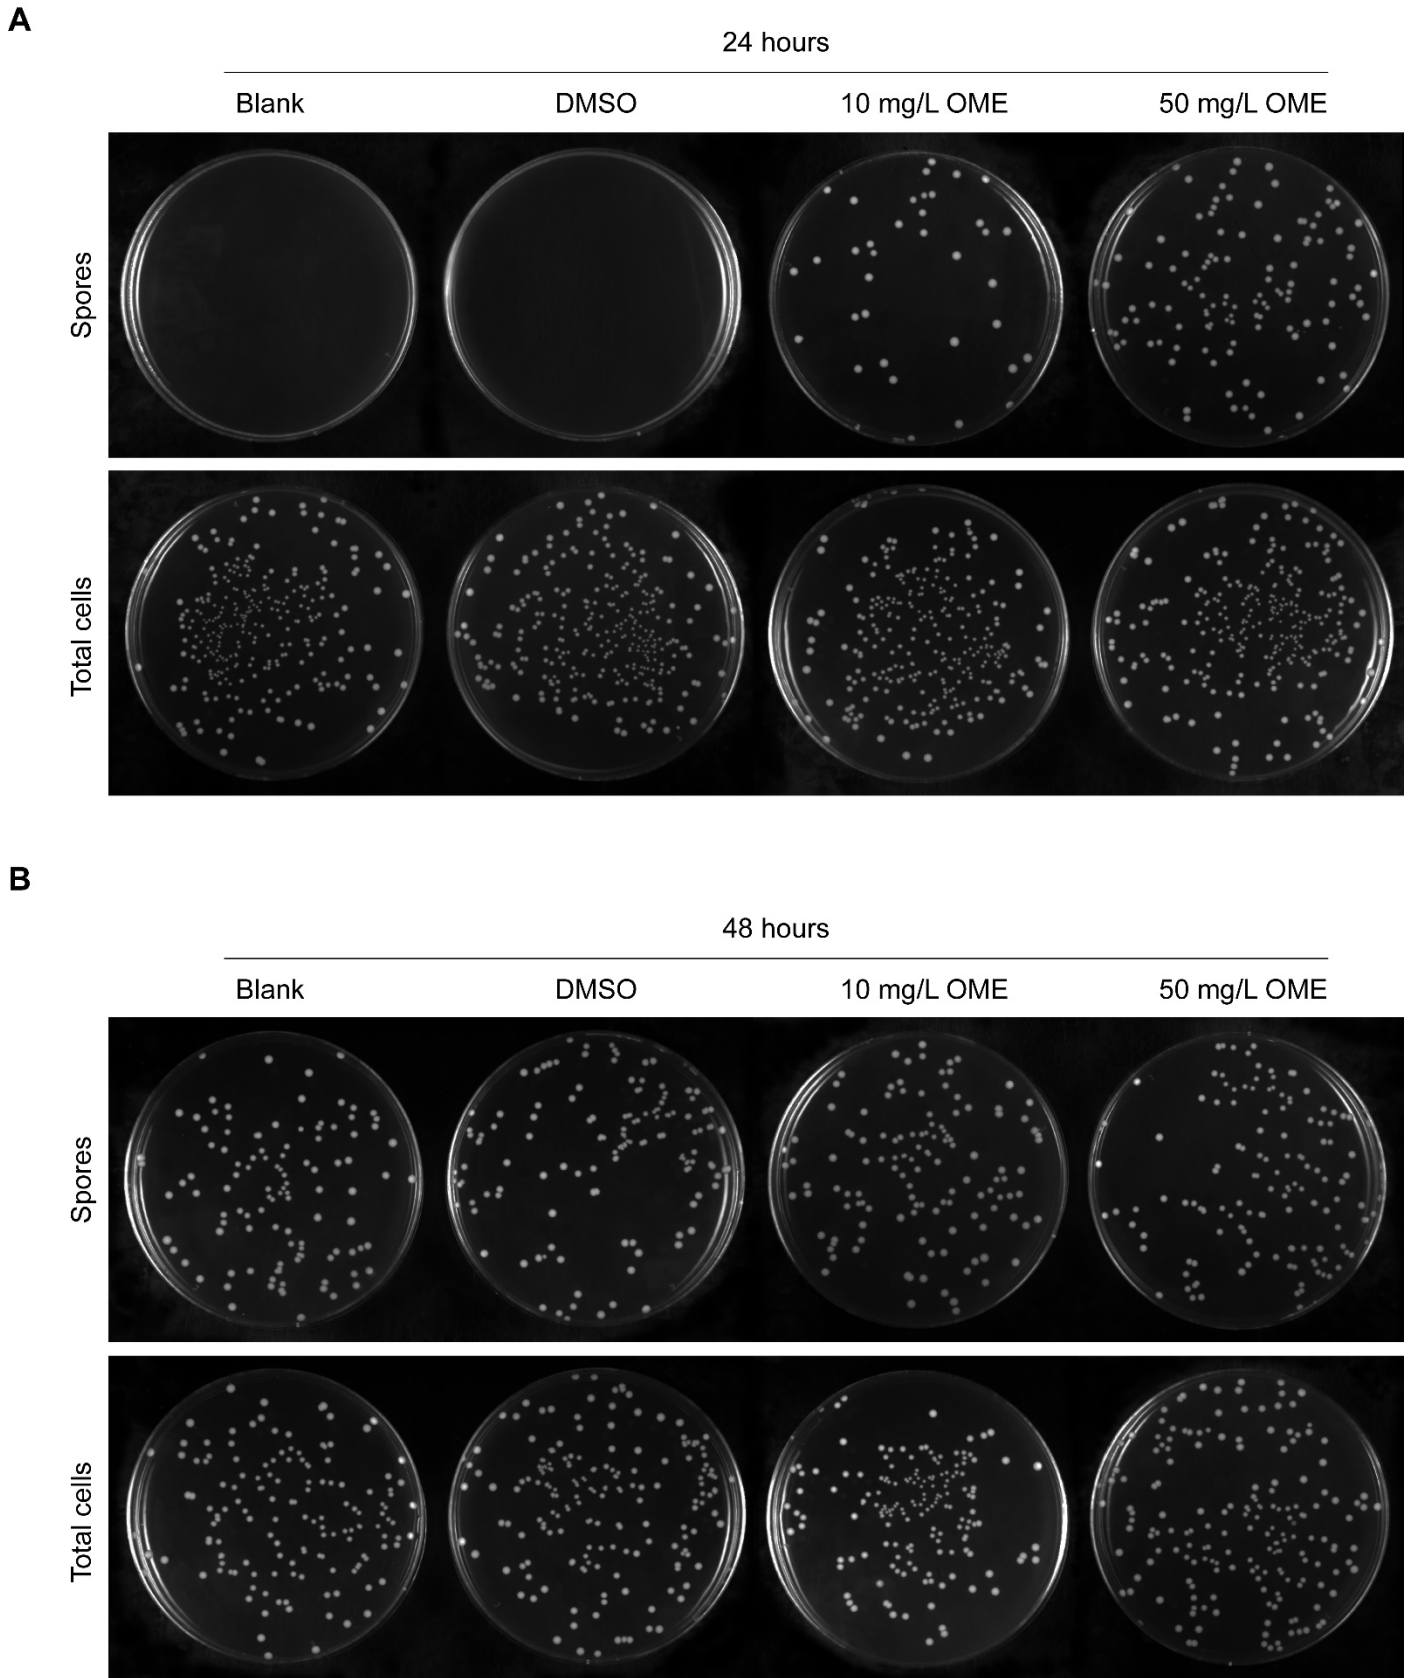

**FIG S1 Omeprazole increases the sporulation efficiency of ST81 strains.** Representative images of the colony forming unit on the brain heart infusion-supplemented agar supplemented with 0.1% sodium taurocholate represent the numbers of heat-resistant spores and total cells after (A) 24 and (B) 48 h of omeprazole treatment.

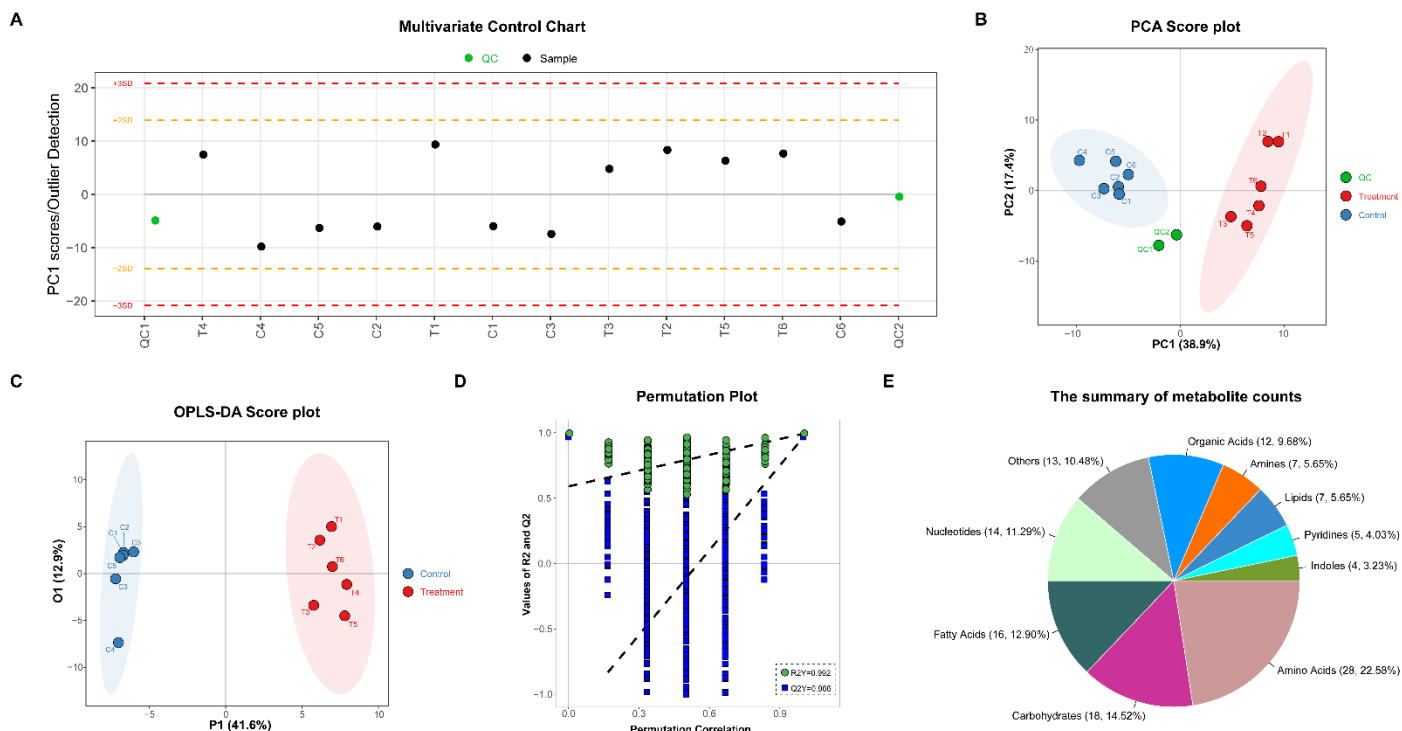

**FIG S2 Overview of metabolite classification and quality control in the metabonomics study.** (A) Each dot in the multivariate control chart represents an individual sample or quality control (QC). Dots with score values exceeding yellow ( $\pm 2SD$ ) and red ( $\pm 3SD$ ) dashed lines are considered as warning results and outliers, respectively. (B, C) The score plots show group separation in principal component analysis (PCA) and orthogonal partial least square discriminant analysis (OPLS-DA). (D) The Permutation plot displays the correlation coefficient between the original y-variable and the permuted y-variable on the x-axis versus the cumulative R2 and Q2 on the y-axis with regression lines. The cumulative values of R2Y and Q2Y of the permuted model are represented on the bottom right of the plot. (E) The number and percentage of the classes of identified metabolite in all samples are shown in a pie chart.

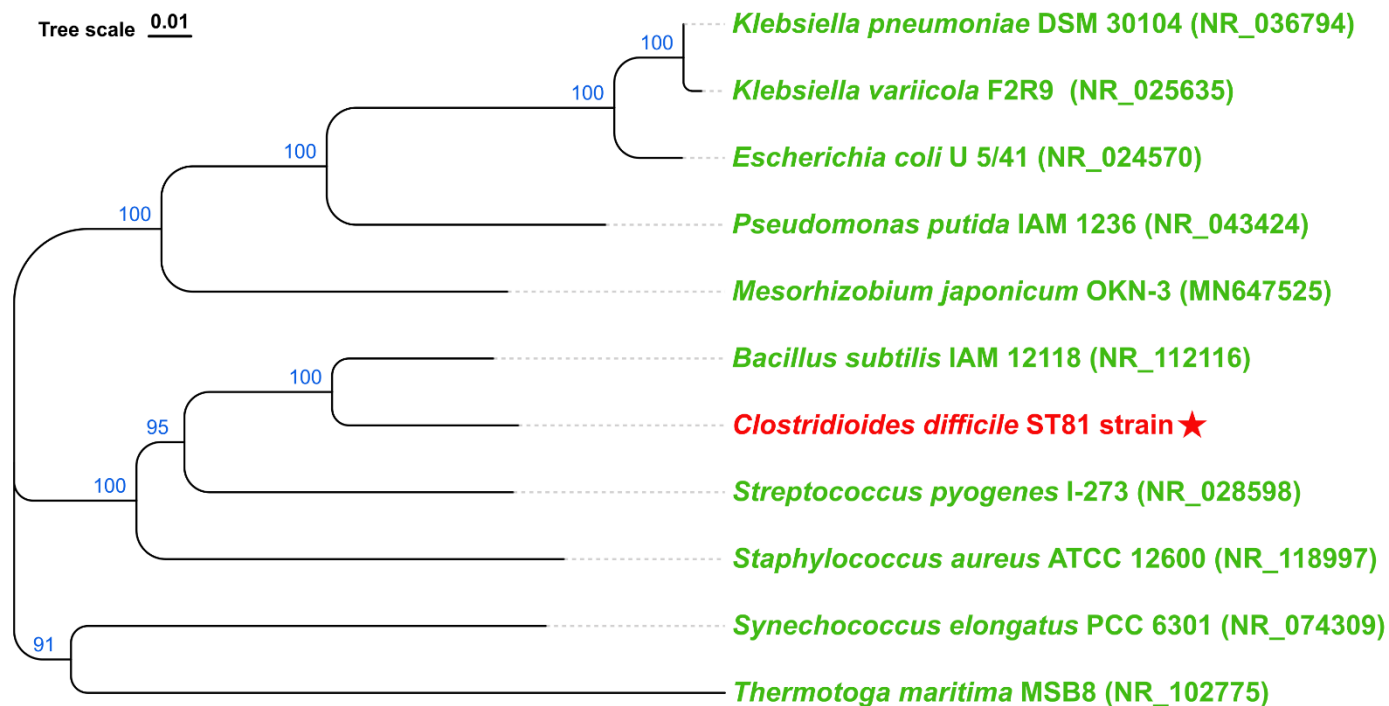

**FIG S3 Evolutionary relationships of strains based on 16S rRNA gene sequencing.** The 16S rRNA sequence of *Clostridioides difficile* ST81 strain is obtained in this study, which is highlighted with red and star in the tree. Accession numbers of reference sequences in GenBank are given in brackets behind the strain names. Bootstrap values based on 1000 replicates are listed as percentages at branching points. Scale bar indicates 0.01 substitutes per nucleotide position.
